# Supplementary material
Source: Elsevier journal article supplement (https://www.sciencedirect.com/science/article/pii/S0034935619301914)
Supplement: mmc2 [file S0034935619301914:mmc2.docx]

| **Complicación** | **Definición** | **Escala de gravedad** |
| --- | --- | --- |
| **Insuficiencia renal aAguda** | - *Leve:* Elevación de la creatinina sérica 1.5-1.9 veces sobre el valor basal en 7 días o ≥0.3mg/dL (30 µmol/L) en 48 h. Diuresis   ≤0.5ml/kg/h durante 6-12h   - *Moderada:* Elevación de la creatinina sérica 2.0-2. 9 veces sobre el valor basal en 7 días. Diuresis ≤0.5ml/kg/h durante 12h. - *Grave:* Elevación de la creatinina sérica 3 veces sobre los valores basales en 7 días o aumento de la Creatinina sérica ≥4.0 mg/dL (≥350 µmol/L) con una elevación aguda de   >0.5 mg/dL (>50 µmol/L) o inicio de terapia de sustitución renal. Diuresis  ≤0.3ml/kg/h durante 24h o anuria durante 12h. | Incluida en la definición |
| **Síndrome de** | Insuficiencia respiratoria, o síntomas | - *Leve:* PaO2:FiO2 entre 200 y300 mmHg con PEEP o CPAP ≥5 cmH2O - *Moderada*: PaO2:FiO2 entre 100 y 200 mmHg y PEEP ≥5 cmH2O - *Grave*: PaO2:FiO2 ≤100 mmHg con PEEP ≥5 cmH2O |
| **distrés** | respiratorios nuevos o que empeoran, |
| **respiratorio** | comenzando en la primera semana |
| **agudo (SDRA)** | tras la cirugía; y una radiografía de |
|  | tórax o una tomografía computarizada |
|  | que demuestre opacidades bilaterales |
|  | que no se explican completamente por |
|  | derrames, colapso lobar/pulmonar o |
|  | nódulos; y la insuficiencia respiratoria |
|  | no se explica completamente por |
|  | insuficiencia cardíaca o sobrecarga de |
|  | líquidos. |
|  | Necesita evaluación objetiva (por |
|  | ejemplo, ecocardiografía) para excluir |
|  | el edema hidrostático si no hay un |
|  | factor de riesgo presente. |
| **Neumonía** | Radiografías de tórax con infiltrados nuevos o progresivos y persistentes, o consolidación, o cavitación, y al menos uno de los siguientes: | - *Leve:* produce solo un daño temporal y generalmente no requeriría un tratamiento clínico específico. - *Moderada:* complicación más grave, pero que no suele causar daño permanente o limitación funcional. Por lo general requiere tratamiento clínico - *Grave:* produce una prolongación significativa de la estancia |
|  | 1. Fiebre (>38°C) sin otra causa conocida 2. Leucopenia (<4,000 leucocitos/mm3) o leucocitosis (>12,000 leucocitos/mm3) |

# MATERIAL SUPLEMENTARIO

# Definición de complicaciones. Variables relacionadas con complicaciones postoperatorias de acuerdo a las recomendaciones europeas (EPCO).

# Jammer I, Wickboldt N, Sander M, Smith A, Schultz MJ, Pelosi P, et al. Standards for definitions and use of outcome measures for clinical effectiveness research in perioperative medicine. European Journal of Anaesthesiology. 2015 Feb;32(2):88–105.

|  | | | 1. En adultos >70 años, alteración del estado mental sin ninguna otra causa reconocida   …y al menos dos de las siguientes:   - - Nueva aparición de esputo purulento o cambio en las características del esputo, o aumento de las secreciones respiratorias, o aumento de las demandas de succión.   - Nueva aparición o empeoramiento de la tos, o disnea, o taquipnea.   - Roncus o sonidos respiratorios bronquiales.   - Empeoramiento del intercambio de gases (hipoxia, aumento de oxígeno o demanda del ventilador) | | | hospitalaria y / o la limitación funcional permanente o la muerte. Casi siempre requiere tratamiento clínico. | | |
| --- | --- | --- | --- | --- | --- | --- | --- | --- |
| **Parada cardíaca** | | | El cese de la actividad mecánica cardiaca, como lo confirma la ausencia de signos de circulación. Los cambios en el ECG pueden corroborar la parada cardíaca. | | | Ninguno: Binario (si/no) | | |
| **Arritmia** | | | Evidencia electrocardiográfica (ECG) de alteración del ritmo cardíaco. | | | - *Leve:* produce solo un daño temporal y generalmente no requeriría un tratamiento clínico específico. - *Moderada:* complicación más grave, pero que no suele causar daño permanente o limitación funcional. Por lo general requiere tratamiento clínico - *Grave:* produce una prolongación significativa de la estancia hospitalaria y / o la limitación funcional permanente o la muerte. Casi siempre requiere tratamiento clínico. | | |
| **Trombosis venosa profunda** | | | Un nuevo coágulo de sangre o trombo dentro del sistema venoso. Se requiere un examen sistemático en los ensayos en los que la TVP es una medida de resultado importante. Las pruebas diagnósticas apropiadas incluyen ecografía, venografía, tomografía computarizada o resonancia magnética | | | - *Leve:* produce solo un daño temporal y generalmente no requeriría un tratamiento clínico específico. - *Moderada:* complicación más grave, pero que no suele causar daño permanente o limitación funcional. Por lo general requiere tratamiento clínico - *Grave:* produce una prolongación significativa de la estancia hospitalaria y / o la limitación funcional permanente o la muerte. Casi siempre requiere tratamiento clínico. | | |
| **Accidente cerebrovascular** | | | Evento cerebral embólico, trombótico o hemorrágico con disfunción motora, sensorial o cognitiva residual persistente (p. Ej., Hemiplejia, hemiparesia, afasia, déficit sensorial, memoria deteriorada). | | | - *Leve:* produce solo un daño temporal y generalmente no requeriría un tratamiento clínico específico. - *Moderada:* complicación más grave, pero que no suele causar daño permanente o limitación funcional. Por lo general requiere tratamiento clínico - *Grave:* produce una prolongación significativa de la estancia hospitalaria y / o la limitación funcional permanente o la muerte. Casi siempre requiere tratamiento clínico. | | |
| **Edema pulmonar** | | | Evidencia de acumulación de líquido en los alvéolos debido a una alteración de la función cardíaca. | | | - *Leve:* produce solo un daño temporal y generalmente no requeriría un tratamiento clínico específico. - *Moderada:* complicación más grave, pero que no suele causar daño permanente o limitación funcional. Por lo general requiere tratamiento clínico - *Grave:* produce una prolongación significativa de la estancia hospitalaria y / o la limitación funcional permanente o la muerte. Casi siempre requiere tratamiento clínico. | | |
| **Embolismo pulmonar** | | | Un nuevo coágulo de sangre o trombo dentro del sistema arterial pulmonar.  Guía: Las pruebas de diagnóstico apropiadas incluyen la gammagrafía y la angiografía por tomografía computarizada. La medición del dímero D en plasma no se recomienda como prueba de diagnóstico en las primeras tres semanas posteriores a la cirugía. | | | - *Leve:* produce solo un daño temporal y generalmente no requeriría un tratamiento clínico específico. - *Moderada:* complicación más grave, pero que no suele causar daño permanente o limitación funcional. Por lo general requiere tratamiento clínico - *Grave:* produce una prolongación significativa de la estancia hospitalaria y / o la limitación funcional permanente o la muerte. Casi siempre requiere tratamiento clínico. | | |
| **Infección del sitio quirúrgico (superficial)** | | | Infección que involucra solo la incisión quirúrgica superficial, que cumple con los siguientes criterios:   1. La infección ocurre dentro de los 30 días posteriores a la cirugía e 2. Implica solo la piel y los tejidos subcutáneos de la incisión y | | | - *Leve:* produce solo un daño temporal y generalmente no requeriría un tratamiento clínico específico. - *Moderada:* complicación más grave, pero que no suele causar daño permanente o limitación | | |
|  | | | 1. El paciente tiene al menos uno de los siguientes:    1. Drenaje purulento de la incisión superficial.    2. Organismos aislados de un cultivo de líquido o tejido obtenido de manera aséptica de la incisión superficial y al menos uno de los siguientes signos o síntomas de infección: dolor o sensibilidad, hinchazón localizada, enrojecimiento o calor, o incisión superficial abierta deliberadamente por el cirujano y es cultura positiva o no cultivada. Un cultivo negativo no cumple con este criterio.    3. Diagnóstico de una infección incisional en el sitio quirúrgico por un cirujano o un médico de cabecera | | | funcional. Por lo general requiere tratamiento clínico  - *Grave:* produce una prolongación significativa de la estancia hospitalaria y / o la limitación funcional permanente o la muerte. Casi siempre requiere tratamiento clínico. | | |
| **Infección del sitio quirúrgico (profunda)** | | | Una infección que involucra partes superficiales y profundas de la incisión quirúrgica y cumple con los siguientes criterios:   1. La infección ocurre dentro de los 30 días posteriores a la cirugía si no se deja un implante quirúrgico o un año si el implante está colocado y 2. La infección parece estar relacionada con el procedimiento quirúrgico e involucra los tejidos blandos profundos de la incisión (por ejemplo, las capas fascial y muscular) y 3. El paciente tiene al menos uno de los siguientes:    1. Drenaje purulento desde la incisión profunda pero no desde el componente órgano / espacio del sitio quirúrgico    2. El cirujano abre una incisión profunda espontáneamente o es deliberadamente abierta y tiene un cultivo positivo o no se realizaron cultivos mientras el paciente presenta al menos uno de los siguientes signos o síntomas de infección: fiebre (> 38 °   C) o dolor localizado o sensibilidad. Un hallazgo cultural negativo no cumple con este criterio.   1. Se encuentra un absceso u otra evidencia de infección que involucra la incisión profunda en el examen directo, durante la cirugía o en el examen histopatológico o radiológico 2. Diagnóstico de una infección incisional profunda en el sitio quirúrgico por un cirujano o un médico tratante | | | - *Leve:* produce solo un daño temporal y generalmente no requeriría un tratamiento clínico específico. - *Moderada:* complicación más grave, pero que no suele causar daño permanente o limitación funcional. Por lo general requiere tratamiento clínico - *Grave:* produce una prolongación significativa de la estancia hospitalaria y / o la limitación funcional permanente o la muerte. Casi siempre requiere tratamiento clínico. | | |
| **Infección del sitio quirúrgico (órgano/espacio)** | | | Una infección que involucra cualquier parte del cuerpo excluyendo la fascia o las capas musculares y cumple con los siguientes criterios:   1. La infección ocurre dentro de los 30 días posteriores a la cirugía y 2. La infección parece estar relacionada con el procedimiento quirúrgico e involucra cualquier parte del cuerpo, excluyendo la incisión en la piel, la fascia o las capas musculares, que se abre o manipula durante el procedimiento quirúrgico y 3. El paciente tiene al menos uno de los siguientes:    1. Drenaje purulento de un drenaje que se coloca a través de una incisión en el órgano / espacio    2. Organismos aislados de un cultivo de líquido o tejido obtenido asépticamente en el órgano / espacio    3. Un absceso u otra evidencia de infección que involucre el órgano / espacio que se encuentra en el examen directo, durante la reoperación o en el examen histopatológico o radiológico    4. Diagnóstico de una infección en el sitio quirúrgico de un órgano / espacio por parte de un cirujano o un médico tratante | | | - *Leve:* produce solo un daño temporal y generalmente no requeriría un tratamiento clínico específico. - *Moderada:* complicación más grave, pero que no suele causar daño permanente o limitación funcional. Por lo general requiere tratamiento clínico - *Grave:* produce una prolongación significativa de la estancia hospitalaria y / o la limitación funcional permanente o la muerte. Casi siempre requiere tratamiento clínico. | | |
| **Bacteremia** | | | Una infección que no está relacionada con la infección en otro sitio y que cumple con alguno de los siguientes criterios:   1. El paciente tiene un patógeno reconocido cultivado a partir de hemocultivos que no está relacionado con una infección en otro sitio 2. El paciente tiene al menos uno de los siguientes signos o síntomas: fiebre (> 38 ° C), escalofríos o hipotensión y al menos uno de los siguientes:    1. Contaminante común de la piel cultivado a partir de dos o más hemocultivos extraídos en ocasiones separadas    2. Contaminante común de la piel que se cultiva a partir de al menos un hemocultivo de un paciente con una vía intravascular, y un médico comienza la terapia antimicrobiana    3. Prueba de antígeno en sangre positiva | | | - *Leve:* produce solo un daño temporal y generalmente no requeriría un tratamiento clínico específico. - *Moderada:* complicación más grave, pero que no suele causar daño permanente o limitación funcional. Por lo general requiere tratamiento clínico - *Grave:* produce una prolongación significativa de la estancia hospitalaria y / o la limitación funcional permanente o la muerte. Casi siempre requiere tratamiento clínico. | | |
| **Infarto de miocardio** | | | Aumento de los valores de biomarcadores cardíacos plasmáticos | | | - *Leve:* produce solo un daño temporal y generalmente no | | |
|  | | | (preferiblemente troponina cardíaca) con al menos un valor por encima del límite de referencia superior del percentil 99 y al menos uno de los siguientes criterios:   - Síntomas de isquemia. - Nuevos o supuestos nuevos cambios de ECG de segmento ST o de onda T o nuevo bloqueo de rama izquierda - Desarrollo de ondas Q patológicas en ECG. - Evidencia radiológica o ecocardiográfica de nueva pérdida de miocardio viable o nueva anomalía del movimiento de la pared regional - Identificación de un trombo intra- coronario en la angiografía o autopsia | | | requeriría un tratamiento clínico específico.   - *Moderada:* complicación más grave, pero que no suele causar daño permanente o limitación funcional. Por lo general requiere tratamiento clínico - *Grave:* produce una prolongación significativa de la estancia hospitalaria y / o la limitación funcional permanente o la muerte. Casi siempre requiere tratamiento clínico. | | |
| **Infección del tracto urinario** | | | Una infección asociada con al menos uno de los siguientes signos o síntomas que deben identificarse dentro de un período de 24 horas: fiebre (> 38 ° C), urgencia, frecuencia, disuria, sensibilidad suprapúbica, dolor del ángulo costovertebral o sensibilidad sin otra causa reconocida y un cultivo de orina positivo de ≥105 unidades formadoras de colonias / ml con no más de dos especies de microorganismos | | | - *Leve:* produce solo un daño temporal y generalmente no requeriría un tratamiento clínico específico. - *Moderada:* complicación más grave, pero que no suele causar daño permanente o limitación funcional. Por lo general requiere tratamiento clínico - *Grave:* produce una prolongación significativa de la estancia hospitalaria y / o la limitación funcional permanente o la muerte. Casi siempre requiere tratamiento clínico. | | |
| **Ileo paralítico** | | | No tolerar alimentos sólidos o defecar durante tres o más días después de la cirugía. | | | - *Leve:* produce solo un daño temporal y generalmente no requeriría un tratamiento clínico específico. - *Moderada:* complicación más grave, pero que no suele causar daño permanente o limitación funcional. Por lo general requiere tratamiento clínico - *Grave:* produce una prolongación significativa de la estancia hospitalaria y / o la limitación funcional permanente o la muerte. Casi siempre requiere tratamiento clínico. | | |
| **Delirium** | | | Delirium puede identificarse utilizando la Lista de verificación de detección de delirium de cuidados intensivos.  Los pacientes son primero evaluados para un nivel alterado de conciencia. Aquellos con una respuesta a la | | | Integrado en la definición | | |
|  | | | estimulación leve o moderada, una respuesta exagerada a la estimulación o la vigilia normal se evalúan completamente. Los pacientes reciben un punto por cada uno de los siguientes criterios: falta de atención, desorientación, alucinaciones, psicosis, agitación o retraso psicomotor, lenguaje o estado de ánimo inapropiado, alteración del ciclo sueño / vigilia o fluctuación de los síntomas. | | |  | | |
| **Dehiscencia de sutura** | | | Fugas de contenido luminal de una conexión quirúrgica entre dos vísceras huecas. El contenido luminal puede surgir ya sea a través de la herida o en el sitio de drenaje, o pueden recoger cerca de la anastomosis, causando fiebre, absceso, septicemia, trastorno metabólico y / o insuficiencia de múltiples órganos. La fuga de contenido luminal del sitio de la anastomosis en un área localizada adyacente, detectado por imágenes, en ausencia de síntomas y signos clínicos deberían ser registrados como una fuga subclínica | | | - *Leve:* produce solo un daño temporal y generalmente no requeriría un tratamiento clínico específico. - *Moderada:* complicación más grave, pero que no suele causar daño permanente o limitación funcional. Por lo general requiere tratamiento clínico - *Grave:* produce una prolongación significativa de la estancia hospitalaria y / o la limitación funcional permanente o la muerte. Casi siempre requiere tratamiento clínico. | | |
| **Hemorragia postoperatorioa** | | | Pérdida de sangre que se produce dentro de las 72 horas posteriores al final de la cirugía, lo que normalmente resultaría en una transfusión de sangre | | | - *Leve:* cualquier signo de hemorragia (cualquier sangrado que sea más de lo esperado, incluido el sangrado que solo se identificó en un estudio por imágenes), que no cumple con los criterios para el tipo moderado- grave, pero requiere al menos uno de los siguientes puntos:   - Intervención médica no quirúrgica por parte de un profesional de la salud (los ejemplos incluyen detener el antiplaquetario, los medicamentos antitrombóticos, la compresión en el sitio de sangrado, el uso de medicamentos para revertir el efecto, como: protamina y vitamina k).   - Requiere hospitalización o mayor nivel de atención*.*   - Requiere evaluación rápida con pruebas como: hemograma, análisis de orina, pruebas de coagulación, endoscopia y tomografía. | | |
|  | | |  | | | - *Moderada:*   - Sangrado con una disminución de la hemoglobina de ≥ 3 a <5 g   / dl (relacionada con el sangrado).   - - Cualquier necesidad de transfusión debido a sangrado evidente.   - Disminución de la hemoglobina ≥ 5 g / dl (relacionada con el sangrado).   - Sangrado que requiere intervención quirúrgica para su control.   - Sangrado que requiere el uso de agentes vasoactivos. - *Grave:* Transfusión de ≥ 5 unidades de glóbulos rojos, en un período de 48 horas. Sangrado fatal | | |

**Complicaciones específicas a Cirugía Gástrica**

Baiocchi GL, Giacopuzzi S, Marrelli D, Reim D, Piessen G, Matos da Costa P, et al. International consensus on a complications list after gastrectomy for cancer. Gastric Cancer. Springer Japan; 2019 Jan;22(1):172–89.

Guía general para graduar las complicaciones

- Leve: La complicación no requiere tratamiento y no tiene relevancia clínica; no hay desviación del seguimiento de rutina; los regímenes terapéuticos permitidos incluyen: antieméticos, antipiréticos, analgésicos, diuréticos, electrolíticos, antibióticos o bien un ligero cambio en la atención con un tratamiento ambulatorio de baja intensidad (tratamiento no quirúrgico)
- Moderada: La complicación requiere tratamiento quirúrgico no planificado, ingreso hospitalario prolongado o reingreso (tratamiento quirúrgico y / o ingreso)
- Grave: La complicación se asocia con un evento que amenaza o que pone en riesgo la vida, que requiere tratamiento invasivo inmediato; o bien conduce a la muerte del paciente

| **COMPLICACIONES INTRAOPERATORIAS** | | |
| --- | --- | --- |
| **Complicación** | **Definición** | **Escala de gravedad** |
| **Lesión no intencionada de vasos u órganos que requiere reconstrucción** | 1. Sección o lesión de la arteria hepática que requiere reconstrucción 2. Sección o lesión de la arteria esplénica que requiere reconstrucción 3. Sección o lesión de la vena porta que requiere reconstrucción 4. Sección o lesión de la vena cava que requiere reconstrucción 5. Sección o lesión del conducto biliar que requiere reconstrucción 6. Lesión esplénica que requiere esplenectomía 7. Cualquier resección intestinal no planeada 8. Resección parcial o completa de páncreas no planeada | - *Resultado binario si/no* |
| **Sangrado intraoperatorio que requiere transfusión urgente** | Incluida en nombre | - *Resultado binario si/no* |
| **Evento médico inesperado que interrumpe o cambia el procedimiento quirúurgico** | Evento intraoperatorio considerado como urgencia vital, tal como anafilaxia, o parada cardiorespiratoria | - *Resultado binario si/no* |

| **COMPLICACIONES POSTOPERATORIAS** | | |
| --- | --- | --- |
| **Complicación** | **Definición** | **Escala de gravedad** |
| **Obstrucción intestinal postoperatoria** | El grupo de consenso acordó que la obstrucción intestinal debe registrarse como una complicación importante si se cumplen tres condiciones: (i) se producen signos (clínicos o radiológicos) de obstrucción mecánica o íleo paralítico, (ii) un paciente no puede recibir alimentación enteral, y (iii) un paciente necesita succión nasogástrica más allá del curso postoperatorio estándar | - *Leve:* Los resultados en sólo un daño temporal y que por lo general no requieren tratamiento clínico específico. - *Moderado:* Complicación más grave, pero uno que no suele dar lugar a un daño permanente o limitación funcional. Por lo general, requiere tratamiento clínico. - *Grave:* Resultados en una prolongación significativa de la estancia hospitalaria y / o limitación funcional permanente o la muerte. Casi siempre requiere tratamiento clínico. |
| ***Perforación o necrosis postoperatoria del intestino que requiere tratamiento quirúrgico (o causa de muerte)*** | . | - *Leve:* No aplicable. - *Moderado:* Complicación más grave, pero uno que no suele dar lugar a un daño permanente o limitación funcional. Por lo general, requiere tratamiento clínico - *Grave:* Resultados en una prolongación significativa de la estancia hospitalaria y / o limitación funcional permanente o la muerte. Casi siempre requiere tratamiento clínico. |

| ***Fuga duodenal*** | *El grupo de estudio acordó registrar la fuga duodenal como una complicación importante independientemente de (i) la forma en que se manifiesta la fuga, (ii) el método de identificación, (iii) las consecuencias clínicas que conlleva y (iv) El tratamiento requerido (endoscópico, drenaje percutáneo, quirúrgico, etc.). Esta definición amplia pero precisa debe abarcar el mayor número de situaciones en las que existe una fuga duodenal. Además, el grupo de consenso acordó que un absceso cerca del muñón duodenal debe registrarse como una complicación importante en este grupo.* | - *Leve:* Los resultados en sólo un daño temporal y que por lo general no requieren tratamiento clínico específico. - *Moderado:* Complicación más grave, pero uno que no suele dar lugar a un daño permanente o limitación funcional. Por lo general, requiere tratamiento clínico. - *Grave:* Resultados en una prolongación significativa de la estancia hospitalaria y / o limitación funcional permanente o la muerte. Casi siempre requiere tratamiento clínico. |
| --- | --- | --- |
| ***Dehiscencia*** | *El grupo de consenso acordó registrar la fuga anastomótica como una complicación importante independientemente de (i) la forma en que se manifiesta la fuga, (ii) el método de identificación, (iii) las consecuencias clínicas que causa y (iv) el tratamiento requerido. Esta definición amplia pero precisa debe abarcar el mayor número de situaciones en las que se produce una fuga anastomótica.* | - *Leve:* Los resultados en sólo un daño temporal y que por lo general no requieren tratamiento clínico específico. - *Moderado:* Complicación más grave, pero uno que no suele dar lugar a un daño permanente o limitación funcional. Por lo general, requiere tratamiento clínico. - *Grave:* Resultados en una prolongación significativa de la estancia hospitalaria y / o limitación funcional permanente o la muerte. Casi siempre requiere tratamiento clínico. |

| ***Fístula pancreática*** |  | - *Leve:* Los resultados en sólo un daño temporal y que por lo general no requieren tratamiento clínico específico. - *Moderado:* Complicación más grave, pero uno que no suele dar lugar a un daño permanente o limitación funcional. Por lo general, requiere tratamiento clínico. - *Grave:* Resultados en una prolongación significativa de la estancia hospitalaria y / o limitación funcional permanente o la muerte. Casi siempre requiere tratamiento clínico. |
| --- | --- | --- |
| ***Pancreatitis*** | *El grupo de consenso acordó que no es suficiente controlar las enzimas de la sangre. También debe haber signos radiológicos de pancreatitis postoperatoria (por ejemplo, edema y / o necrosis en la tomografía computarizada)* | - *Leve:* Los resultados en sólo un daño temporal y que por lo general no requieren tratamiento clínico específico. - *Moderado:* Complicación más grave, pero uno que no suele dar lugar a un daño permanente o limitación funcional. Por lo general, requiere tratamiento clínico. - *Grave:* Resultados en una prolongación significativa de la estancia hospitalaria y / o limitación funcional permanente o la muerte. Casi siempre requiere tratamiento clínico. |
| ***Otro líquido anormal postoperatorio de drenaje y / o colecciones abdominales sin fugas gastrointestinales que impiden la extracción del drenaje y / o que requieren tratamiento*** | *El líquido anormal postoperatorio procedente del drenaje o las colecciones abdominales son complicaciones frecuentes después de la gastrectomía por cáncer. El grupo de consenso acordó que estos eventos deberían registrarse como complicaciones mayores si (i) es imposible eliminar el drenaje, o su eliminación ocurre 5 días o más después de la fecha establecida por los protocolos de cada centro; y / o (ii) se requiere tratamiento invasivo (percutáneo o quirúrgico) para eliminar el líquido o las colecciones anormales* | - *Leve:* No aplicable tratamiento clínico específico. - *Moderado:* Complicación más grave, pero uno que no suele dar lugar a un daño permanente o limitación funcional. Por lo general, requiere tratamiento clínico. - *Grave:* Resultados en una prolongación significativa de la estancia hospitalaria y / o limitación funcional permanente o la muerte. Casi siempre requiere tratamiento clínico. |
| ***Vaciado gástrico tardío (hasta el 10º día postoperatorio) que requiere tratamiento o retrasa el alta*** | *La fecha en que los diferentes centros permiten que un paciente reanude la alimentación y comprueba si el paciente tolera la ingesta oral varía mucho. El grupo de consenso acordó elegir el décimo día postoperatorio. Además, debe ocurrir una de las siguientes dos condiciones (o ambas): (i) un paciente requiere tratamiento endoscópico o quirúrgico para resolver esta complicación, (ii) su alta hospitalaria se retrasa por más de 5 días con respecto a La fecha fijada por los protocolos de un centro.* | - *Leve:* No aplicable tratamiento clínico específico. - *Moderado:* Complicación más grave, pero uno que no suele dar lugar a un daño permanente o limitación funcional. Por lo general, requiere tratamiento clínico. - *Grave:* Resultados en una prolongación significativa de la estancia hospitalaria y / o limitación funcional permanente o la muerte. Casi siempre requiere tratamiento clínico. |
| **Reoperación** | Resultado binario SI/NO | - *Leve:* No aplicable - *Moderada:* Requiere tratamiento quirúrgico - *Grave:* En caso de que la reintervención conduzca a más complicaciones |
| **Readmisión**  (en los 30 días tras la intervención) Gravedad: | Resultado binario SI/NO |
| **Muerte**  (en los 30 días tras la intervención) | Resultado binario SI/NO | Resultado binario SI/NO |
